# Supplementary material for: A porous 3D heterometal-organic framework containing both lanthanide and high-spin Fe(ii) ions
Source: Royal Society of Chemistry journal article supplement (doi:10.1039/b821496d), 2009-01-01
Supplement: b821496d.pdf [file b821496d.pdf]

## SUPPORTING INFORMATION

### **A Porous 3D Heterometal-Organic Framework Containing Both Lanthanide and High-Spin Fe(II) Ions**

Bin Zhao, Xiao-Yan Chen, Zhi Chen, Wei Shi, Peng Cheng,\* Shi-Ping Yan, Dai-Zheng Liao

#### **General Methods**

Analyses for C, H and N were carried out on a Perkin-Elmer analyzer. PXRD were recorded on a rigakudmax 2500 diffractometer using Cu K $\alpha$  radiation. Thermal gravimetric analyses were completed on a NETZSCH TG 209 instrument. Variable-temperature magnetic susceptibilities were performed on a Quantum Design MPMS-7 SQUID magnetometer. Diamagnetic corrections were made with Pascal's constants for all the constituent atoms. The luminescent spectra were recorded on WGY-10 spectrometer. And the Mössbauer spectra were measured by an Oxford MS-500 model constant acceleration Mössbauer spectrometer with a 1024 multichannel analyzer. The velocity was calibrated by an  $\alpha$ -Fe foil. The radiation source was  $^{57}\text{Co/Rh}$ . A xenon (methane) proportional counter was used as a detector. Computer fits were performed to all measured data.

#### **Crystal Structure Determination**

Diffraction intensity data for single crystals of **1-3** were collected at room temperature on a Bruker Smart CCD diffractometer equipped with graphite-monochromated MoK $\alpha$  radiation ( $\lambda = 0.71073$  Å). The structures were solved by the direct method and refined by the full-matrix least-squares method on  $F^2$  with anisotropic thermal parameters for all non-hydrogen atoms.<sup>[1,2]</sup> Hydrogen atoms were located geometrically and refined isotropically. See the CIF file for details.

#### **Crystal data for **2** and **3****

For **2** ( $\text{C}_{21}\text{H}_{18}\text{GdFe}_{1.5}\text{N}_3\text{O}_{16.5}$ ):  $M = 817.41$ , Hexagonal,  $P6/mcc$ ,  $a = b = 15.291(4)$  Å,  $c = 15.573(7)$  Å,  $V = 3153.4(17)$  Å<sup>3</sup>,  $Z = 4$ ,  $2\theta_{\text{max}} = 50.02^\circ$ ,  $T = 293(2)$  K,  $R_{\text{int}} = 0.1206$ , reflections collected/unique = 7195/948, GOF = 1.018,  $R1[I > 2\sigma(I)] = 0.0343$  and  $wR2 = 0.0927$ . Crystal data

for **3** ( $C_{21}H_{18}TbFe_{1.5}N_3O_{16.5}$ ):  $M = 819.07$ , Hexagonal,  $P6/mcc$ ,  $a = b = 15.199(2)$  Å,  $c = 15.589(5)$  Å,  $V = 3118.8(12)$  Å<sup>3</sup>,  $Z = 4$ ,  $2\theta_{max} = 50.06^\circ$ ,  $T = 293(2)$  K,  $R_{int} = 0.0550$ , reflections collected/unique = 11486/948, GOF = 1.089,  $R1[I > 2\sigma(I)] = 0.0256$  and  $wR2 = 0.0673$ .

**Table S1. Crystal data and structure refinement of 1-3**

|                                      | <b>1</b>                                                            | <b>2</b>                                                            | <b>3</b>                                                             |
|--------------------------------------|---------------------------------------------------------------------|---------------------------------------------------------------------|----------------------------------------------------------------------|
| Empirical formula                    | $C_{21}H_{18}EuFe_{1.5}N_3O_{16.5}$                                 | $C_{21}H_{18}GdFe_{1.5}N_3O_{16.5}$                                 | $C_{21}H_{18}TbFe_{1.5}N_3O_{16.5}$                                  |
| Formula weight                       | 812.12                                                              | 817.41                                                              | 819.07                                                               |
| Temperature                          | 293(2) K                                                            | 293(2) K                                                            | 293(2) K                                                             |
| Wavelength                           | 0.71073 Å                                                           | 0.71073 Å                                                           | 0.71073 Å                                                            |
| Monochromator                        | Graphite                                                            | Graphite                                                            | Graphite                                                             |
| Crystal System                       | Hexagonal                                                           | Hexagonal                                                           | Hexagonal                                                            |
| Space group                          | $P6/mcc$                                                            | $P6/mcc$                                                            | $P6/mcc$                                                             |
| Unit cell Dimensions                 | $a = b = 15.238(3)$ Å<br>$c = 15.663(5)$ Å<br>$\gamma = 120^\circ$  | $a = b = 15.291(4)$ Å<br>$c = 15.573(7)$ Å<br>$\gamma = 120^\circ$  | $a = b = 15.199(2)$ Å<br>$c = 15.589(5)$ Å<br>$\gamma = 120^\circ$   |
| Volume                               | 3149.8(13) Å <sup>3</sup>                                           | 3153.4(17) Å <sup>3</sup>                                           | 3118.8(12) Å <sup>3</sup>                                            |
| Z                                    | 4                                                                   | 4                                                                   | 4                                                                    |
| Density (calculated)                 | 1.713 Mg/m <sup>3</sup>                                             | 1.722 Mg/m <sup>3</sup>                                             | 1.744 Mg/m <sup>3</sup>                                              |
| Absorption coefficient               | 2.728 mm <sup>-1</sup>                                              | 2.839 mm <sup>-1</sup>                                              | 3.012 mm <sup>-1</sup>                                               |
| $F(000)$                             | 1596                                                                | 1600                                                                | 1604                                                                 |
| $\theta$                             | 3.09 to 25.02°                                                      | 3.08 to 25.01°                                                      | 3.10 to 25.03°                                                       |
| Limiting indices                     | $-18 \leq h \leq 12$<br>$-4 \leq k \leq 18$<br>$-18 \leq l \leq 18$ | $-5 \leq h \leq 18$<br>$-18 \leq k \leq 17$<br>$-17 \leq l \leq 17$ | $-18 \leq h \leq 16$<br>$-12 \leq k \leq 18$<br>$-18 \leq l \leq 17$ |
| Reflections collected / unique       | 8226 / 960<br>[R(int) = 0.0603]                                     | 7195 / 948<br>[R(int) = 0.1206]                                     | 11486 / 948<br>[R(int) = 0.0550]                                     |
| Refinement method                    | Full-matrix<br>least-squares on $F^2$                               | Full-matrix<br>least-squares on $F^2$                               | Full-matrix<br>least-squares on $F^2$                                |
| Data / restraints / parameters       | 960 / 0 / 74                                                        | 948 / 0 / 76                                                        | 948 / 0 / 74                                                         |
| Goodness-of-fit on $F^2$             | 1.082                                                               | 1.018                                                               | 1.089                                                                |
| Final R indices [ $I > 2\sigma(I)$ ] | $R_1 = 0.0245$<br>$wR_2 = 0.0621$                                   | $R_1 = 0.0343$<br>$wR_2 = 0.0927$                                   | $R_1 = 0.0256$<br>$wR_2 = 0.0673$                                    |
| R indices (all data)                 | $R_1 = 0.0468$<br>$wR_2 = 0.0733$                                   | $R_1 = 0.0643$<br>$wR_2 = 0.1049$                                   | $R_1 = 0.0422$<br>$wR_2 = 0.0742$                                    |
| Largest diff. Peak and hole          | 1.014 and -0.569 e. Å <sup>-3</sup>                                 | 1.311 and -0.398 e. Å <sup>-3</sup>                                 | 1.054 and -0.320 e. Å <sup>-3</sup>                                  |

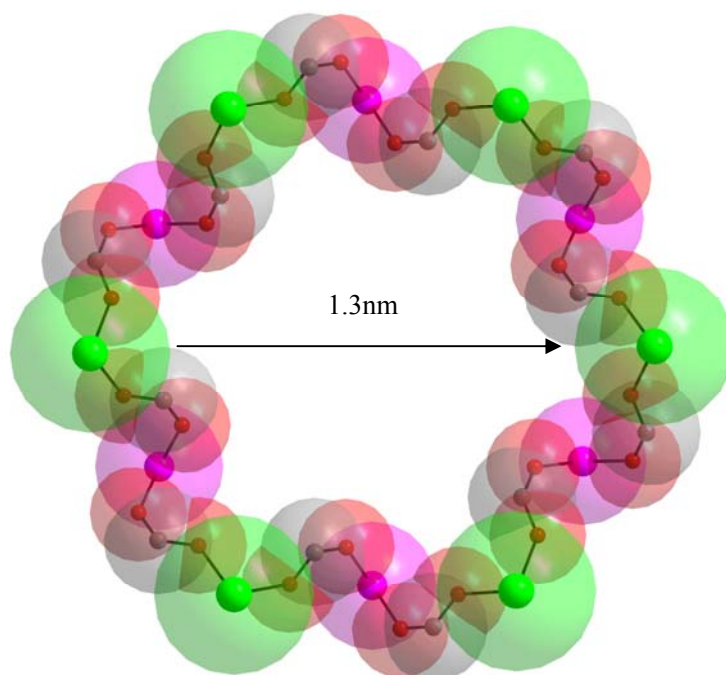

**Figure S1.** The space filling and ball-stick modes of the cross section of 1D tunnel in **1**. Color codes: green, Eu; grey, C; red, O; purple, Fe.

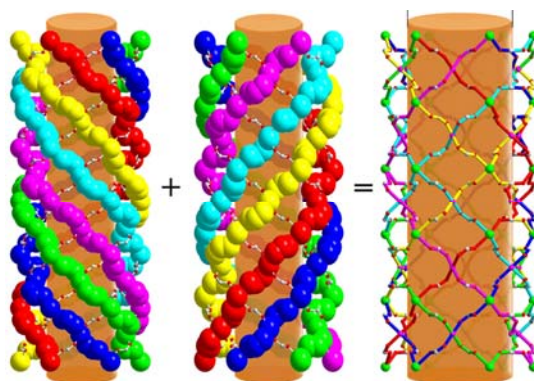

**Figure S2.** The wall of 1D channel was constructed by interweaving left- and right-hand sextuple-stranded helices.

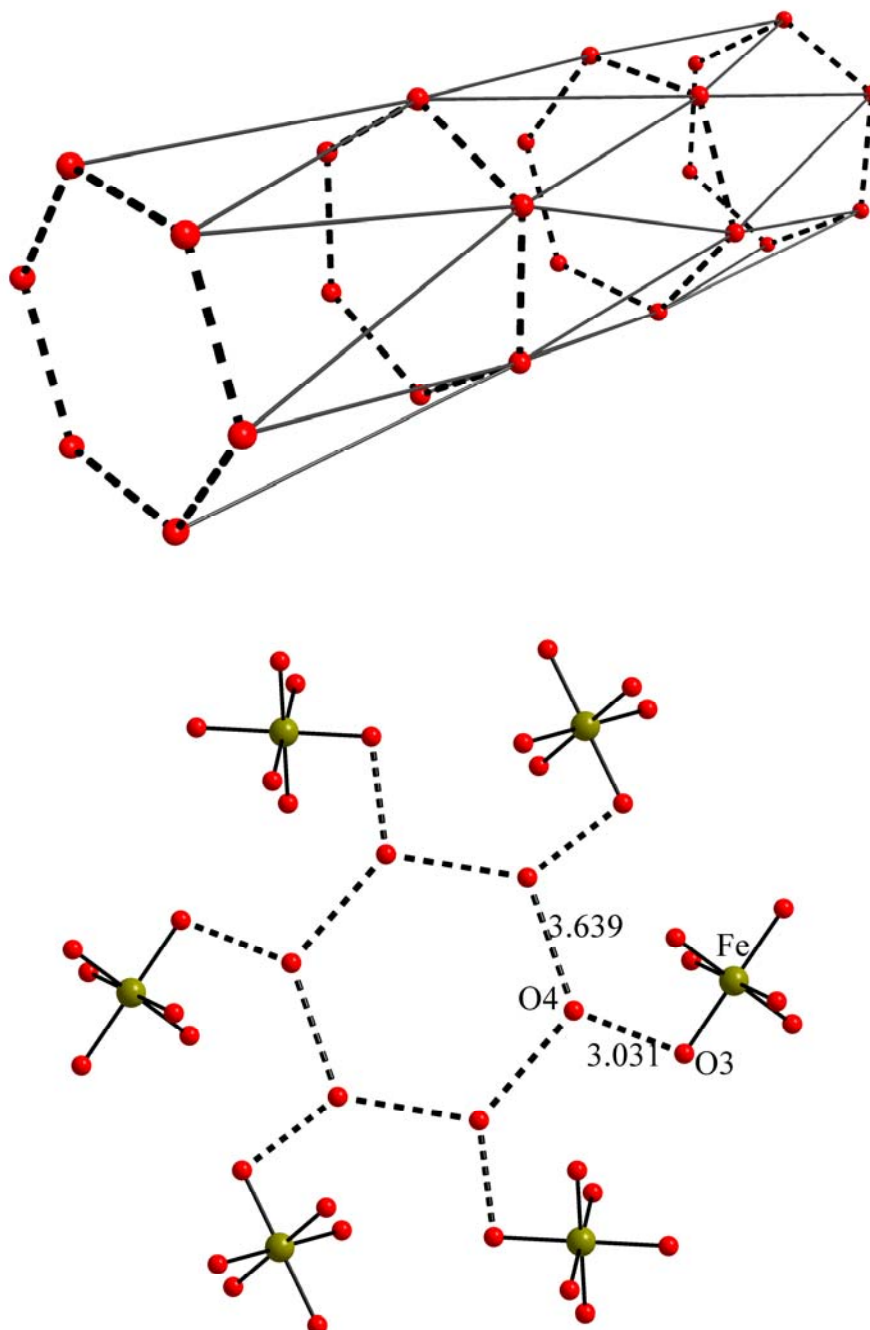

**Figure S3.** (Top) Side view of 'water pipe' in 1D channel with  $C_6$  symmetry. (Bottom) The distance between adjacent water in the 1D channel, and hydrogen bonds between lattice water molecules and coordinated water on  $Fe^{2+}$ .

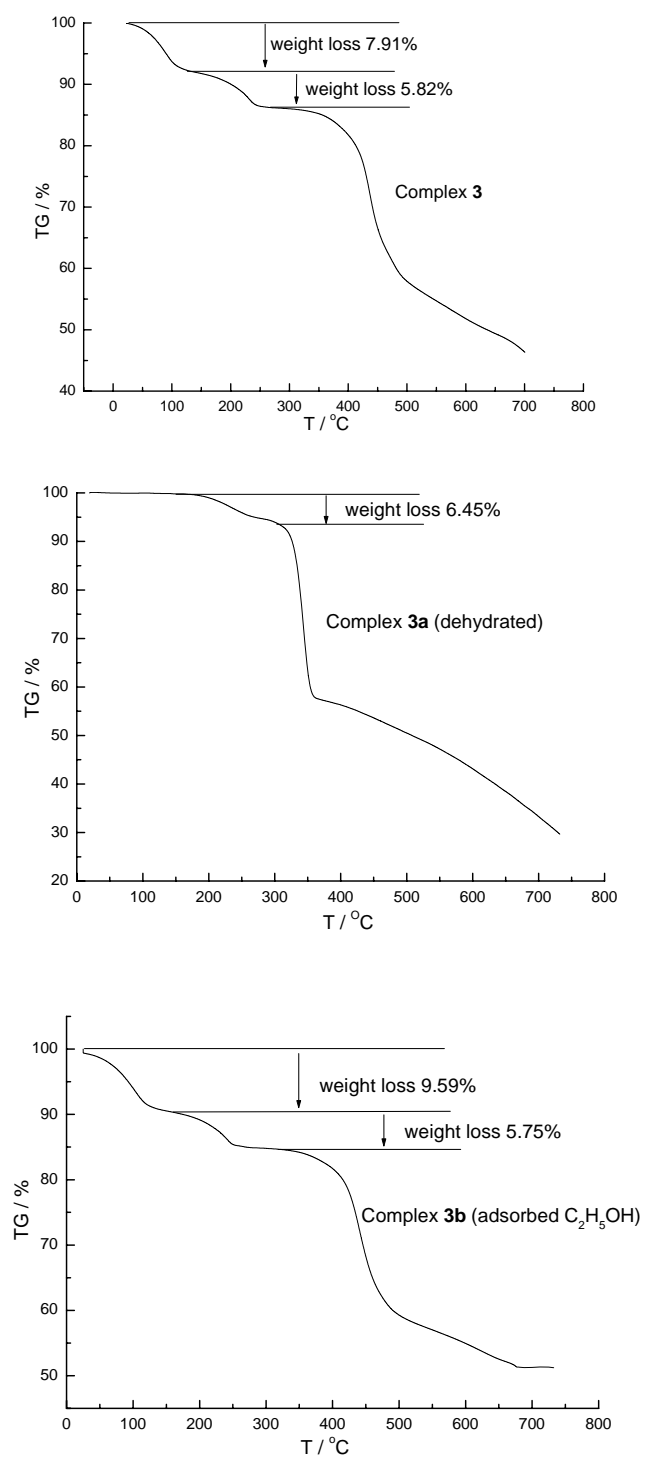

**Figure S4.** TG plots of complexes **3**, **3a** and **3b**.

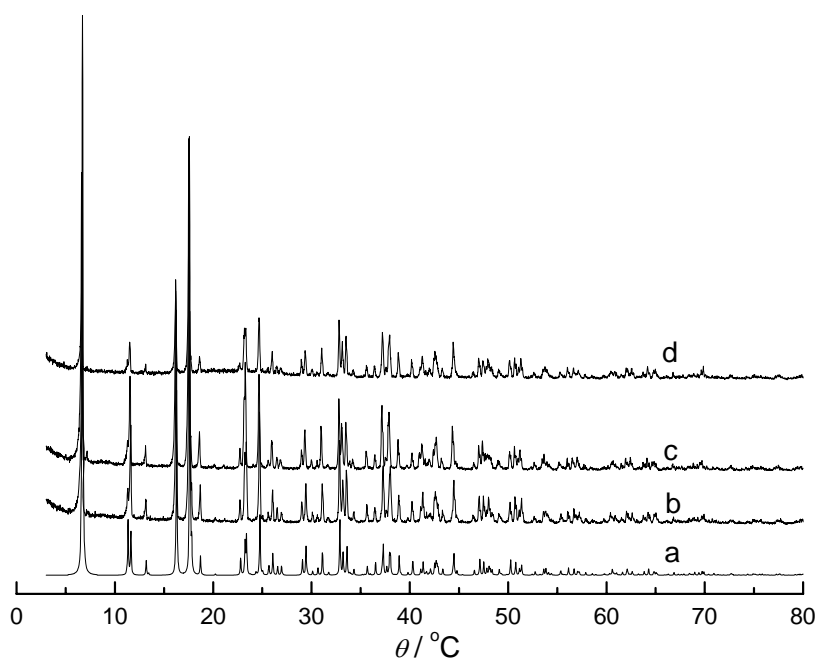

**Figure S5.** a) the simulated PXRD pattern for **3**; b), c) and d) corresponding to experimental ones for **3**, **3a** (dehydrated) and **3b** (adsorbed C<sub>2</sub>H<sub>5</sub>OH), respectively.

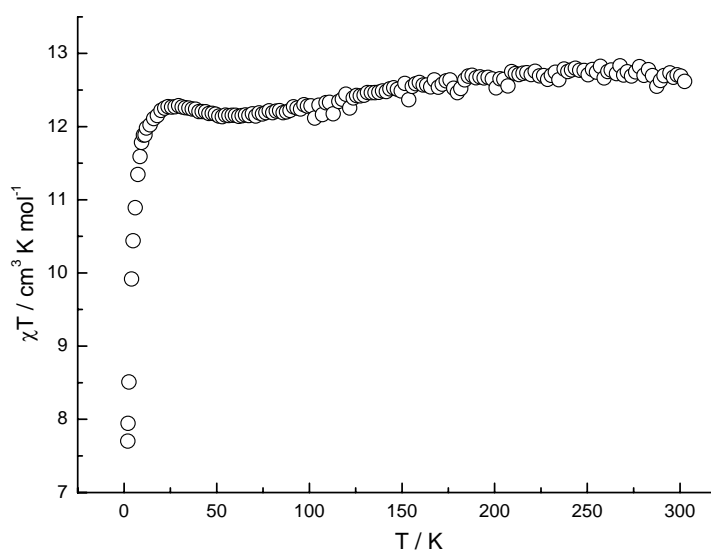

**Figure S6.** Plots of  $\chi_M T$  versus  $T$  for **2**.

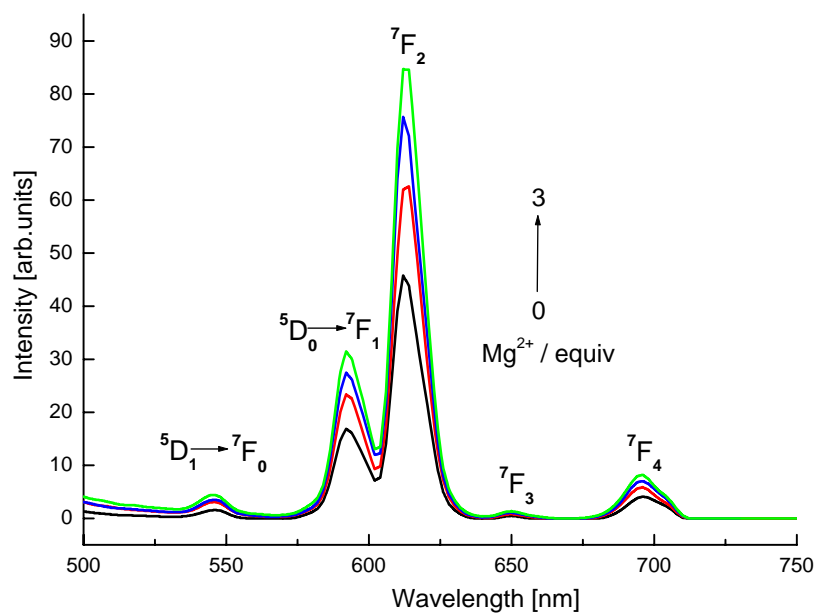

**Figure S7.** Emission spectra of complex **1** in DMF at RT (excited at 304 nm) in the presence of various concentrations of  $Mg^{2+}$  ( $MgCl_2$ ) ions: 0 ~ 3 equivalents  $Mg^{2+}$  ions with respect to complex **1**. Color codes: black, no addition; red, one equivalent; blue, two equivalents; green, three equivalents.

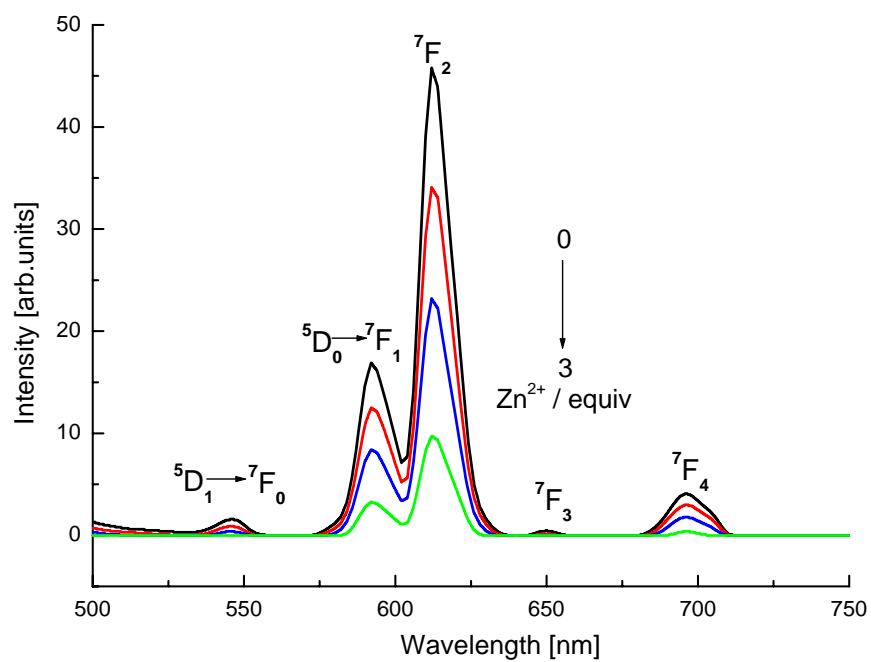

**Figure S8.** Emission spectra of complex **1** in DMF at RT (excited at 304 nm) in the presence of various concentrations of  $Zn^{2+}$  ( $ZnCl_2$ ) ions: 0 ~ 3 equivalents  $Zn^{2+}$  ions with respect to complex **1**. Color code: black, no addition; red, one equivalent; blue, two equivalents; green, three equivalents



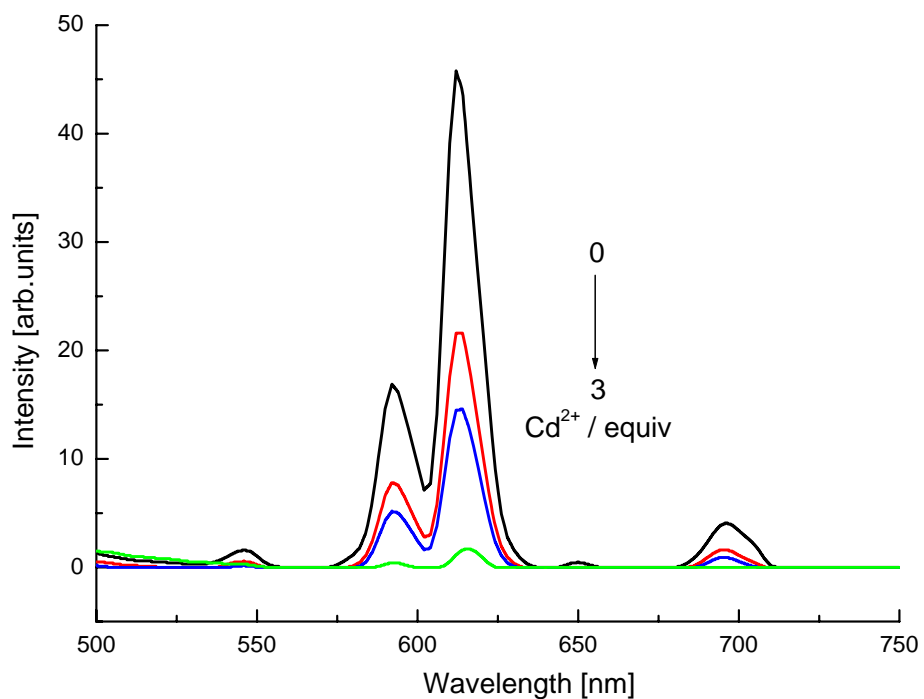

**Figure S9.** Emission spectra of complex **1** in DMF at RT (excited at 304 nm) in the presence of various concentrations of  $\text{Cd}^{2+}$  ( $\text{CdCl}_2$ ) ions: 0 ~ 3 equivalents  $\text{Cd}^{2+}$  ions with respect to complex **1**. Color code: black, no addition; red, one equivalent; blue, two equivalents; green, three equivalents.

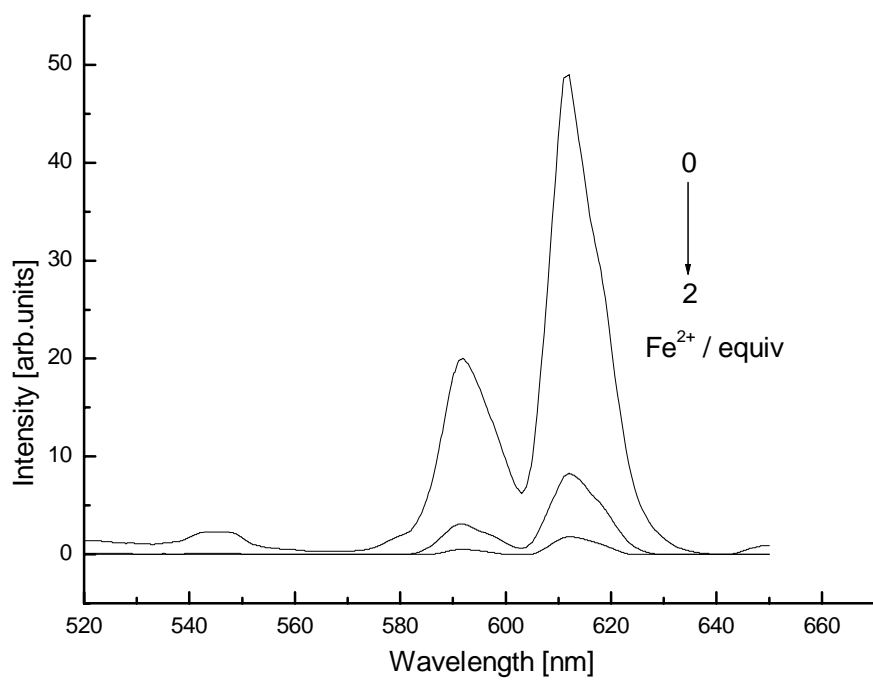

**Figure S10.** Emission spectra of complex **1** in DMF at RT (excited at 304 nm) in the presence of various concentrations of Fe<sup>2+</sup> (FeCl<sub>2</sub>) ions: 0 ~ 2 equivalents Fe<sup>2+</sup> ions with respect to complex **1**.

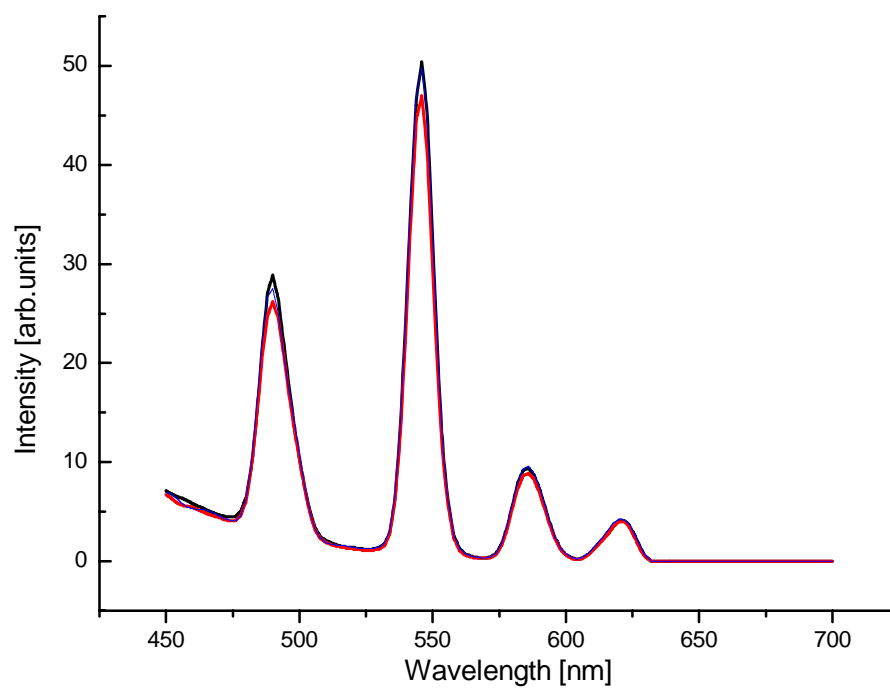

**Figure S11.** Emission spectra of complex **3** in DMF at RT (excited at 311 nm) in the presence of various concentrations of Mg<sup>2+</sup> (MgCl<sub>2</sub>) ions: 0 ~ 2 equivalents Mg<sup>2+</sup> ions with respect to complex **3**. Color code: black, no addition; red, one equivalent; blue, two equivalents.

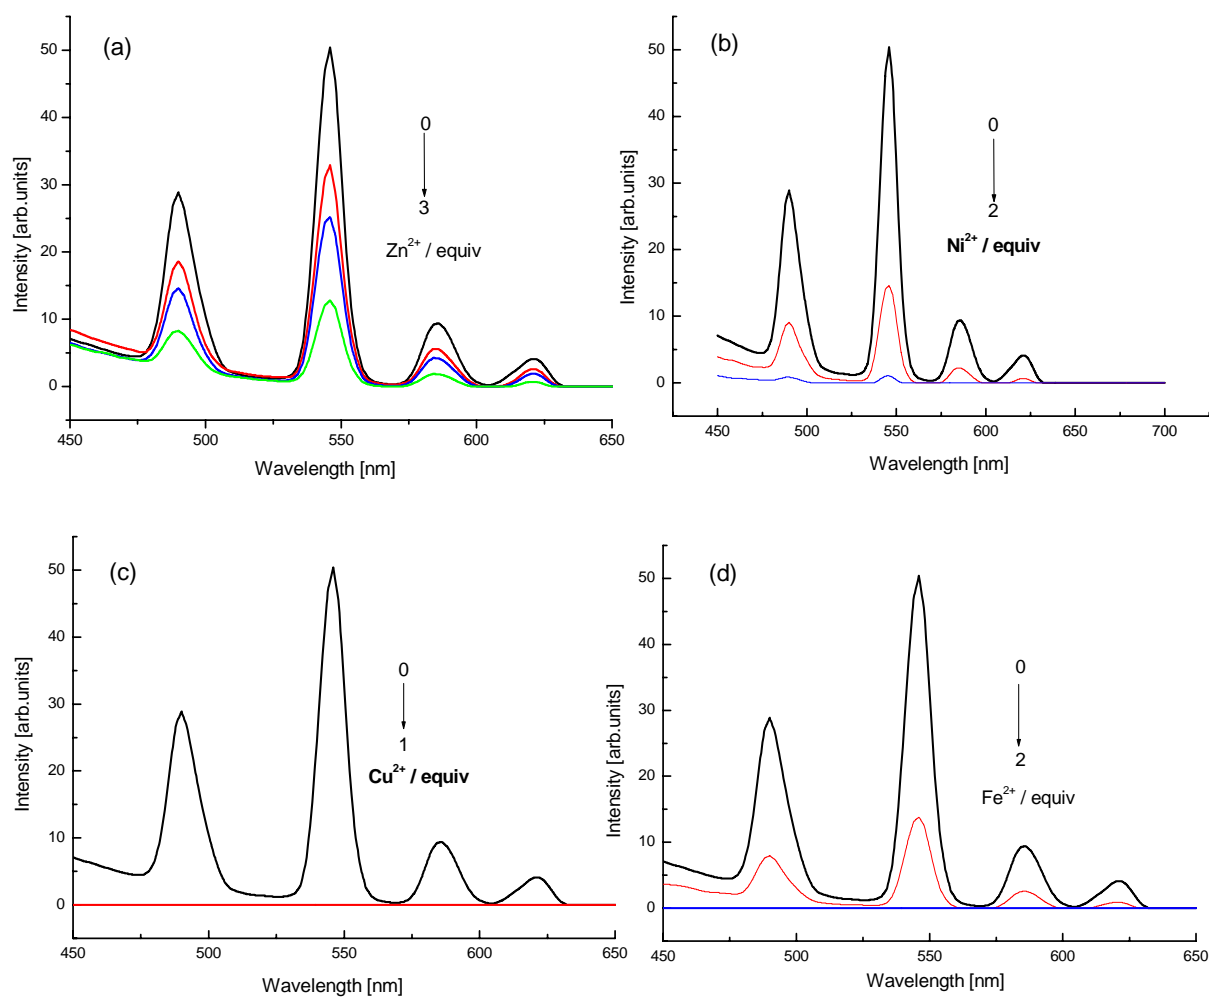

**Figure S12.** Emission spectra of complex **3** in DMF at RT (excited at 311 nm) in the presence of various concentrations of  $MCl_2$  ( $M = Zn$ , (a);  $Ni$ , (b);  $Cu$ , (c);  $Fe$ , (d)) ions: 0 ~ 3 equivalents  $M^{2+}$  ions with respect to complex **3**. Color code: black, no addition; red, one equivalent; blue, two equivalents; green, three equivalents.

## References

- (1) Sheldrick, G. M. *SHELXS 97, Program for the Solution of Crystal Structures*; University of Göttingen: Germany, **1997**.
- (2) Sheldrick, G. M. *SHELXL 97, Program for the Refinement of Crystal Structures*; University of Göttingen: Germany, **1997**.
